# Supplementary material
Source: ML conference proceedings conference paper supplement (https://openreview.net/forum?id=7uRTPwyUum)
Supplement: supplementary_material [file attachment]

# Unsupervised Image-to-Video Adaptation via Category-aware Flow Memory Bank and Realistic Video Generation

Anonymous Authors

## 1 OVERVIEW

In this document, we conduct ‘Integrating domain adaptation technique’ experiments with Full Model on  $E \rightarrow H$  and  $S \rightarrow U$ . Moreover, we present the computational information of our method. Finally, we visualize the generated video frames. The source codes are also provided.

## 2 ADDITIONAL EXPERIMENTS

**Further evaluations of integrating domain adaptation (DA) techniques.** We further investigate the performance of combining our Full Model with DA methods on  $E \rightarrow H$  and  $S \rightarrow U$  benchmarks and the results are presented in Tab. 1. The results demonstrate that the integration with typical DA methods, significantly enhances the model’s recognition capability. The performance not only achieves new state-of-the-art results on both benchmarks but also attains comparable performance to supervised learning on  $S \rightarrow U$  benchmark. The improvement is attributed to the effective mitigation of distribution discrepancies by employing classical DA methods. Our experimental results further emphasize the high compatibility between our approach and DA methods.

**Table 1: Accuracies on  $E \rightarrow H$  and  $S \rightarrow U$ , averaged over 3 random trials.**

| method           | $E \rightarrow H$ | $S \rightarrow U$ |
|------------------|-------------------|-------------------|
| Full Model       | 77.4              | 97.3              |
| Full Model + DAN | 77.4              | 98.0              |
| Full Model + MCC | 78.4              | 99.2              |
| Full Model + BNM | <b>79.2</b>       | <b>99.3</b>       |

**Analysis of computational costs.** As shown in Table. 2, we present the computational information of video generation and our Full Model. Although the video generation requires more computational resources, it only needs to run once, and the generated frames can be used throughout the training process.

**Table 2: Computational information**

| component        | Params(M) | GFLOPs | Train/Inference time(s) |
|------------------|-----------|--------|-------------------------|
| Video generation | 266.13    | 371.85 | - / 0.17                |
| Full Model       | 24.59     | 65.62  | 0.16 / 0.13             |

## 3 VISUALIZATIONS OF GENERATED FRAMES

In this section, we visualize generated video frames for certain categories including ‘Hource Race’, ‘Running’, ‘Climb’ and ‘Ski-jet’. The visualization results are shown in Fig. 1. We exhibit two groups of generated frames for each category. The first column

represents the input still images from source domain, and the subsequent columns show the sampled second, sixth, tenth and sixteenth frames, respectively.

Through visualization, we can observe that by simulating the arbitrary movements of the camera in 3D space, we can obtain more realistic video frames. These generated video frames are beneficial for learning a high-performance spatial-temporal model.

## 4 SOURCE CODES

We provide the source codes for training the spatial-temporal model. Details can be referred to readme.md in codes/.

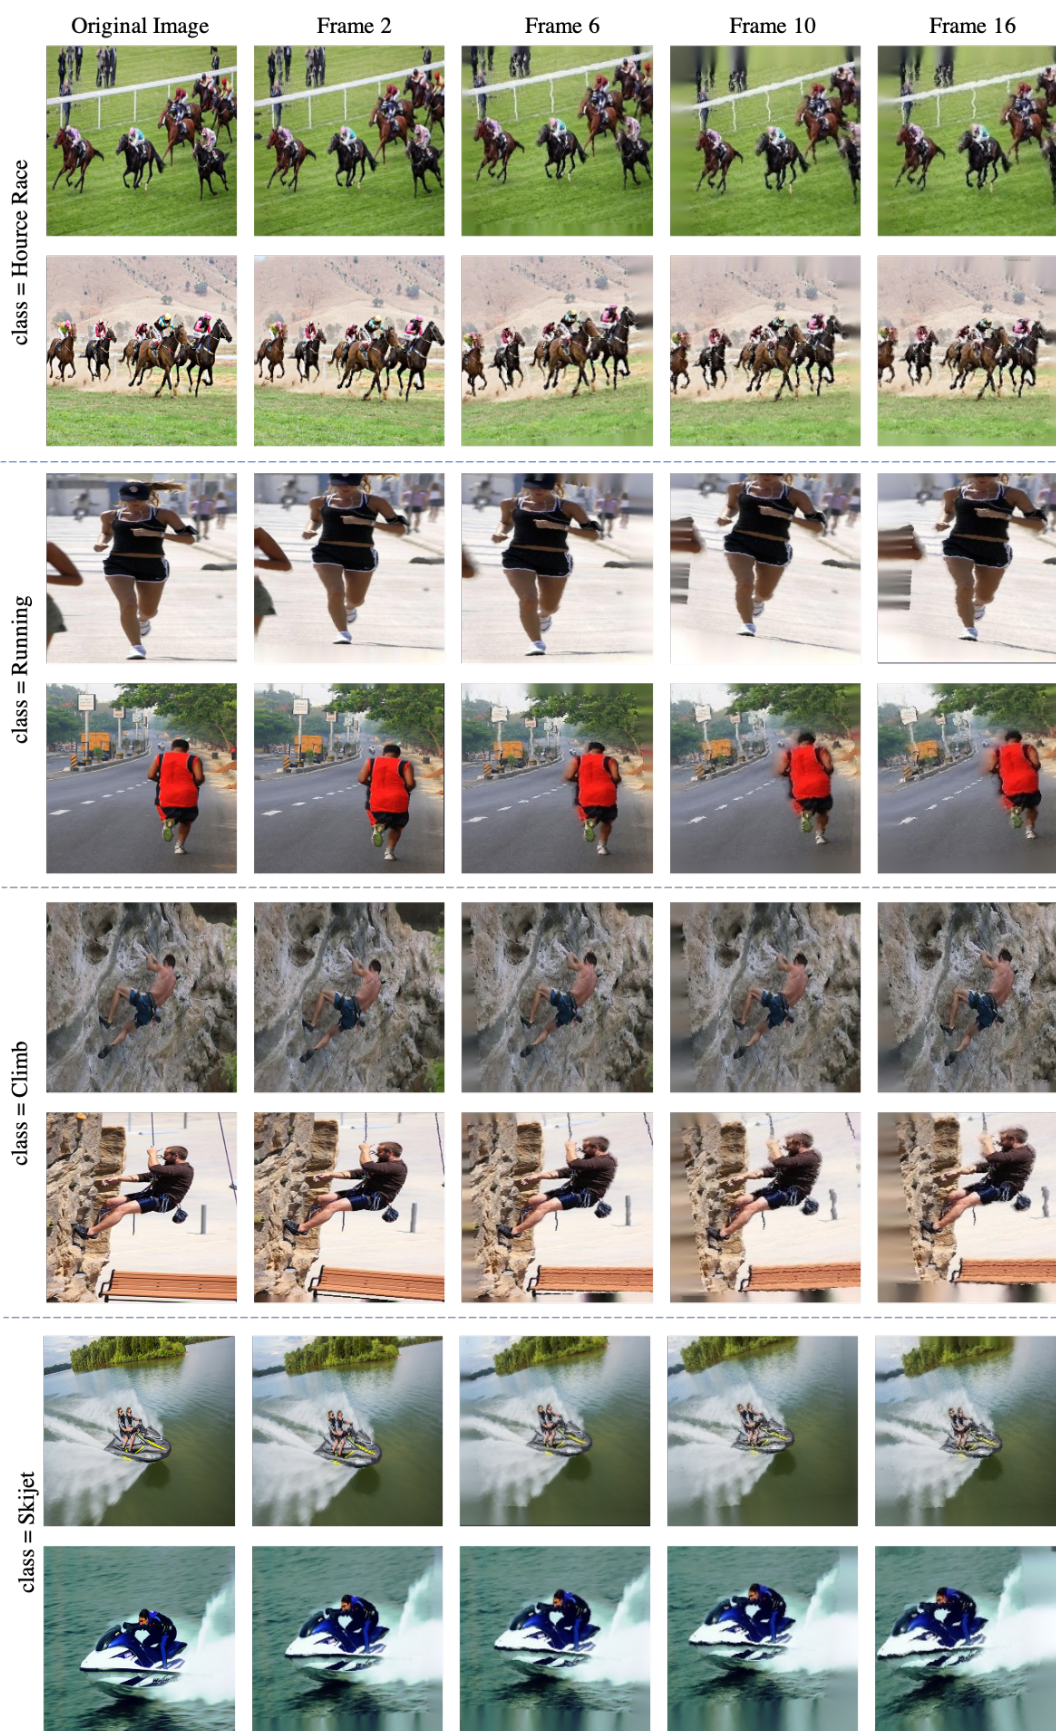

Figure 1: Visualizations of generated frames.
